# Supplementary material for: Altered amino and fatty acids metabolism in Sudanese prostate cancer patients: insights from metabolic analysis
Source: PubMed Central journal article supplement — J Circ Biomark. 2024 Dec 16;13:36–44. doi: 10.33393/jcb.2024.3146 (PMC11653783; doi:10.33393/jcb.2024.3146), 2024-12-16
Supplement: Supplementary_material.pdf [file Supplementary_material.pdf]

**TableS1: Demographic and clinical features of study's patients according to their ethnicity**

| Feature                                  | AA (n=24)           | NC (n=17)           | NS (n=9)            | P-value  | FDR      |
|------------------------------------------|---------------------|---------------------|---------------------|----------|----------|
| Formate, median [IQR]                    | 0.039 [0.034 0.048] | 0.036 [0.029 0.045] | 0.036 [0.029 0.046] | 5.36e-01 | 9.02e-01 |
| Phenylalanine, median [IQR]              | 0.058 [0.049 0.067] | 0.054 [0.051 0.057] | 0.059 [0.048 0.06]  | 9.59e-01 | 9.81e-01 |
| Tyrosine, median [IQR]                   | 0.065 [0.051 0.071] | 0.063 [0.057 0.071] | 0.059 [0.049 0.061] | 2.56e-01 | 9.02e-01 |
| Unknown signal at 7.14 ppm, median [IQR] | 0 [0 0]             | 0 [0 0]             | 0 [0 0]             | 9.23e-01 | 9.78e-01 |
| Histidine, median [IQR]                  | 0.066 [0.054 0.077] | 0.067 [0.048 0.08]  | 0.072 [0.056 0.081] | 7.62e-01 | 9.65e-01 |
| Glucose, median [IQR]                    | 3.411 [3.016 3.711] | 3.887 [3.399 4.214] | 3.453 [3.051 4.625] | 1.74e-01 | 9.02e-01 |
| Mannose, median [IQR]                    | 0.05 [0.039 0.059]  | 0.067 [0.052 0.085] | 0.059 [0.046 0.068] | 5.16e-02 | 9.02e-01 |
| Ascorbate, median [IQR]                  | 0.008 [0 0.014]     | 0.009 [0.007 0.013] | 0.009 [0 0.01]      | 4.83e-01 | 9.02e-01 |
| Lactate, median [IQR]                    | 2.41 [2.004 3.11]   | 1.903 [1.862 2.654] | 2.37 [1.91 2.728]   | 2.66e-01 | 9.02e-01 |
| Creatinine, median [IQR]                 | 0.087 [0.069 0.105] | 0.084 [0.061 0.099] | 0.085 [0.078 0.131] | 6.67e-01 | 9.29e-01 |
| Creatine, median [IQR]                   | 0.044 [0.017 0.06]  | 0.029 [0.015 0.047] | 0.041 [0.011 0.061] | 6.36e-01 | 9.29e-01 |
| Glycine, median [IQR]                    | 0.305 [0.242 0.356] | 0.273 [0.22 0.307]  | 0.218 [0.206 0.295] | 2.83e-01 | 9.02e-01 |
| Citrate, median [IQR]                    | 0.185 [0.177 0.2]   | 0.166 [0.137 0.18]  | 0.192 [0.179 0.213] | 5.04e-02 | 9.02e-01 |
| Glutamine, median [IQR]                  | 0.253 [0.18 0.319]  | 0.289 [0.243 0.356] | 0.252 [0.12 0.301]  | 6.77e-01 | 9.29e-01 |
| Pyruvate, median [IQR]                   | 0.064 [0.053 0.074] | 0.066 [0.046 0.089] | 0.075 [0.048 0.093] | 8.04e-01 | 9.78e-01 |
| Glutamate, median [IQR]                  | 0.257 [0.172 0.304] | 0.206 [0.174 0.285] | 0.305 [0.227 0.392] | 3.43e-01 | 9.02e-01 |
| Acetoacetate, median [IQR]               | 0.019 [0.013 0.03]  | 0.018 [0.013 0.023] | 0.021 [0.018 0.031] | 5.46e-01 | 9.02e-01 |
| Acetate, median [IQR]                    | 0.08 [0.065 0.1]    | 0.063 [0.053 0.092] | 0.062 [0.053 0.063] | 4.65e-01 | 9.02e-01 |
| Alanine, median [IQR]                    | 0.476 [0.363 0.601] | 0.45 [0.387 0.54]   | 0.462 [0.425 0.536] | 9.27e-01 | 9.78e-01 |

| Feature                                  | AA (n=24)                 | NC (n=17)               | NS (n=9)                  | P-value  | FDR      |
|------------------------------------------|---------------------------|-------------------------|---------------------------|----------|----------|
| 3-Hydroxybutyrate, median [IQR]          | 0 [0 0.011]               | 0 [0 0]                 | 0.016 [0 0.031]           | 1.57e-01 | 9.02e-01 |
| Ethanol, median [IQR]                    | 3.111 [1.163 3.921]       | 3.044 [1.995 3.66]      | 0.182 [0.082 3.019]       | 3.34e-01 | 9.02e-01 |
| Valine, median [IQR]                     | 0.203 [0.173 0.218]       | 0.2 [0.165 0.224]       | 0.202 [0.159 0.224]       | 9.81e-01 | 9.81e-01 |
| Isoleucine, median [IQR]                 | 0.064 [0.053 0.072]       | 0.069 [0.049 0.081]     | 0.061 [0.056 0.071]       | 8.97e-01 | 9.78e-01 |
| Leucine, median [IQR]                    | 0.067 [0.06 0.075]        | 0.071 [0.052 0.078]     | 0.062 [0.06 0.067]        | 7.55e-01 | 9.65e-01 |
| 2-Hydroxybutyrate, median [IQR]          | 0 [0 0]                   | 0 [0 0]                 | 0 [0 0]                   | 6.84e-01 | 9.29e-01 |
| Unknown signal at 1.24 ppm, median [IQR] | 0.006 [0 0.018]           | 0 [0 0.014]             | 0 [0 0]                   | 4.09e-01 | 9.02e-01 |
| Protein NH, median [IQR]                 | 155.247 [144.766 167.639] | 163.282 [143.9 171.356] | 165.432 [154.859 182.029] | 5.46e-01 | 9.02e-01 |
| Unsaturated lipid -CH=CH-, median [IQR]  | 11.479 [9.785 13.97]      | 12.515 [10.3 14.36]     | 12.429 [9.818 13.584]     | 8.69e-01 | 9.78e-01 |
| Lipid alpha-CH2, median [IQR]            | 1.551 [0.607 2.139]       | 1.964 [0.87 2.802]      | 1.906 [0.862 2.778]       | 4.94e-01 | 9.02e-01 |
| Cholesterol, median [IQR]                | 0.725 [0.642 0.904]       | 0.784 [0.689 0.98]      | 0.815 [0.701 0.922]       | 4.99e-01 | 9.02e-01 |
| Lipid =CH-CH2-CH=, median [IQR]          | 4.912 [4.474 5.678]       | 5.412 [5.058 5.687]     | 5.356 [4.471 5.55]        | 3.57e-01 | 9.02e-01 |
| Glycerol phospholipid, median [IQR]      | 0.465 [0.03 0.688]        | 0.642 [0.286 1.087]     | 0.561 [0.343 1.104]       | 3.77e-01 | 9.02e-01 |
| Phospholipid, median [IQR]               | 1.959 [1.465 3.131]       | 2.54 [1.872 3.401]      | 2.329 [2.023 2.768]       | 4.04e-01 | 9.02e-01 |
| Lipid beta-CH2, median [IQR]             | 7.096 [5.544 7.793]       | 7.696 [5.81 8.91]       | 7.47 [6.398 7.874]        | 5.24e-01 | 9.02e-01 |
| Lipid CH2, median [IQR]                  | 71.709 [53.856 80.572]    | 77.866 [58.46 82.816]   | 71.732 [53.338 78.685]    | 6.2e-01  | 9.29e-01 |
| Lipid CH3, median [IQR]                  | 30.049 [27.317 33.856]    | 31.673 [26.06 33.989]   | 30.612 [27.285 31.887]    | 8.47e-01 | 9.78e-01 |
| GlycB, median [IQR]                      | 0.336 [0.295 0.376]       | 0.34 [0.312 0.424]      | 0.316 [0.27 0.328]        | 5.04e-01 | 9.02e-01 |
| GlycA, median [IQR]                      | 1.558 [1.424 1.608]       | 1.607 [1.427 1.913]     | 1.457 [1.268 1.686]       | 3.27e-01 | 9.02e-01 |
